# Supplementary material
Source: PubMed Central journal article supplement (PMC3697618)

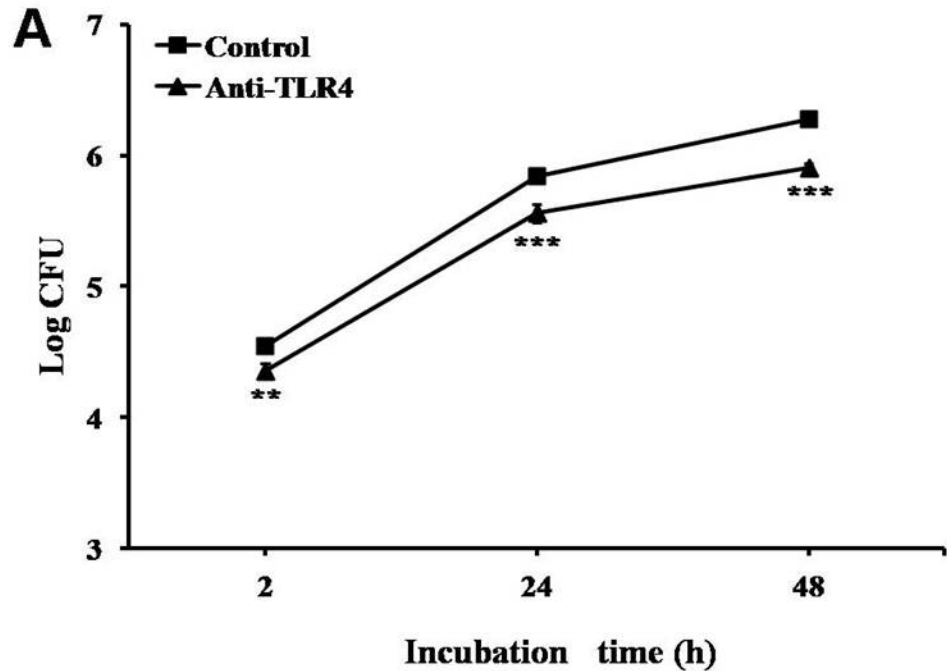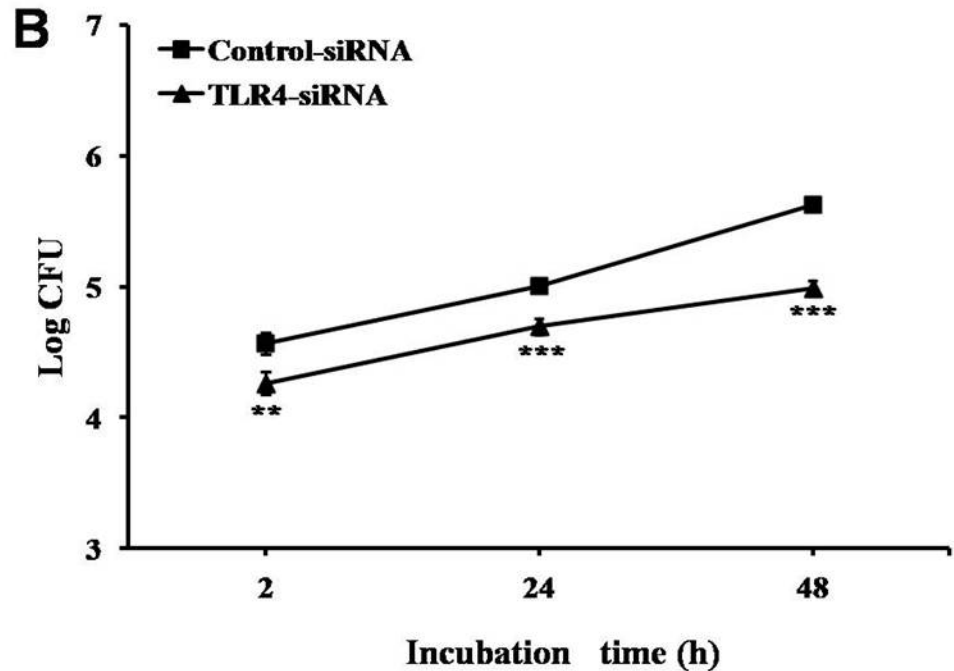

Supplement: IAI.00403-13_zii999090199so2.pdf [file IAI.00403-13_zii999090199so2.pdf]

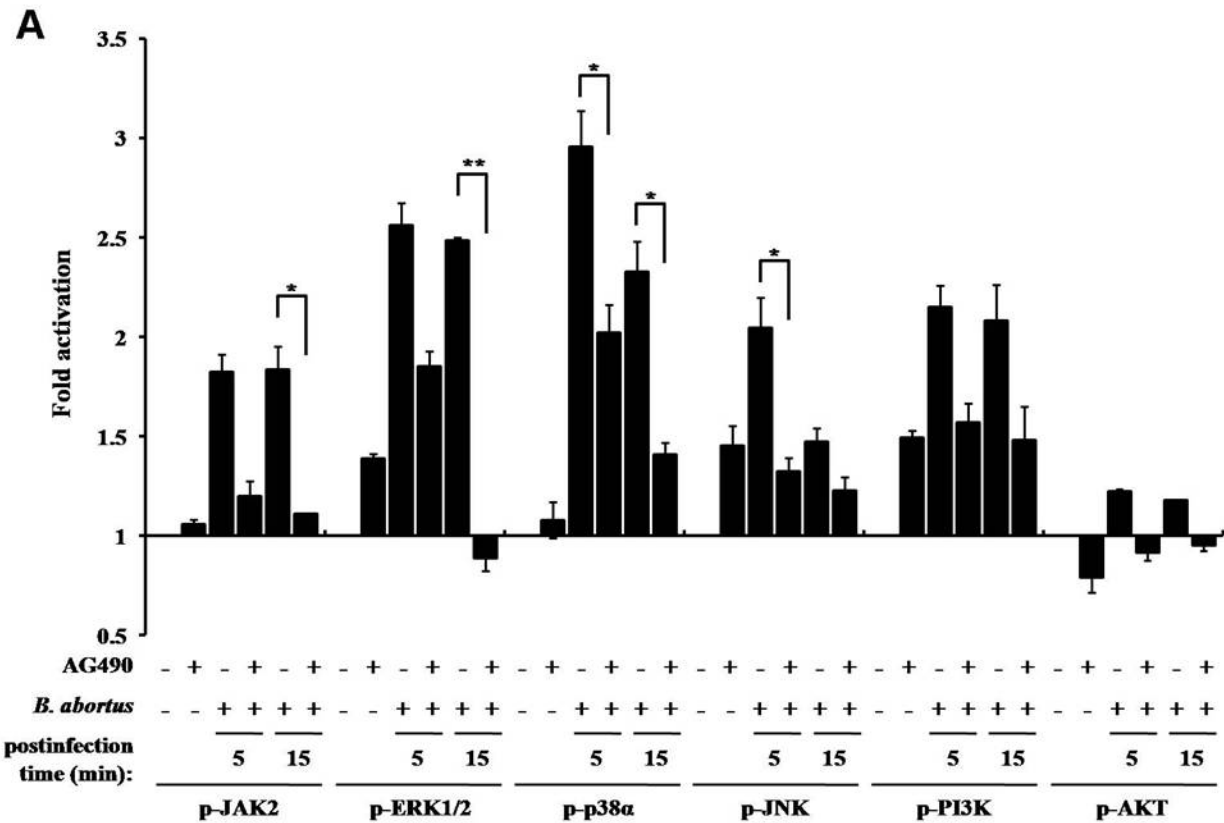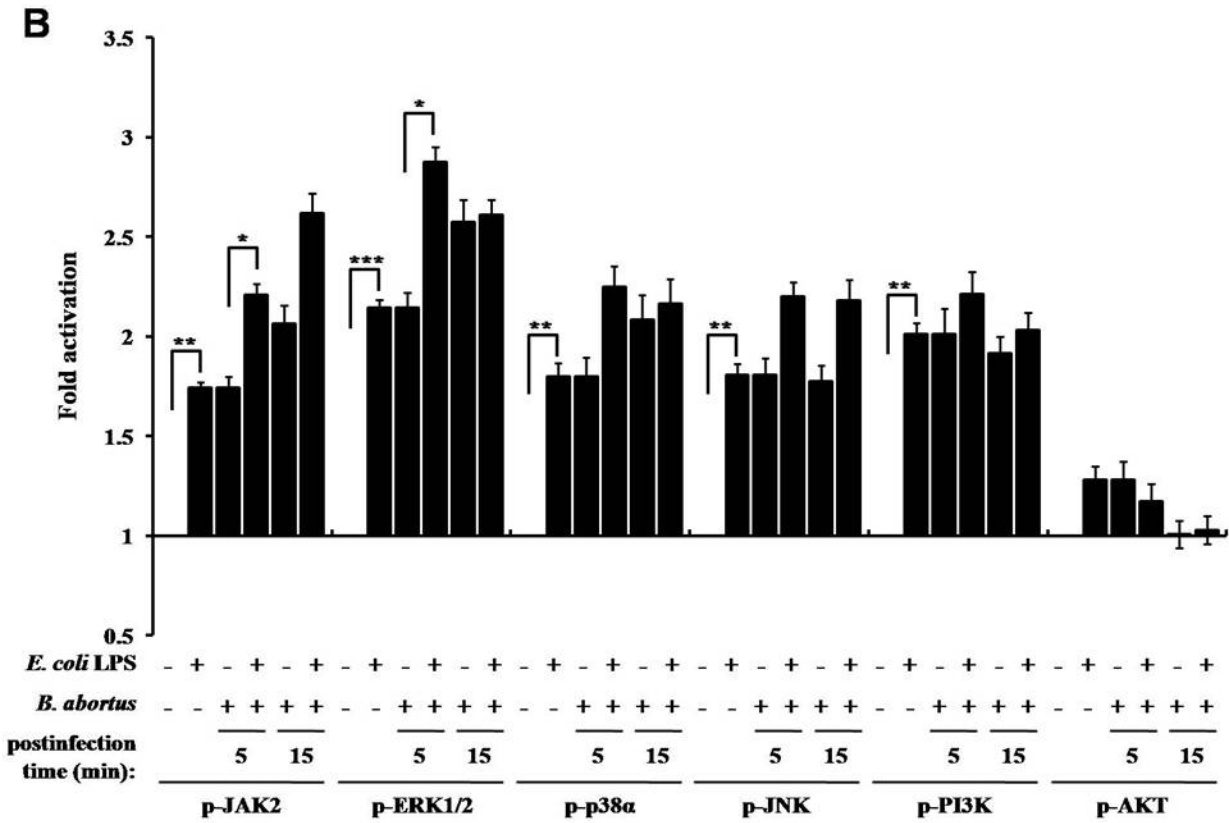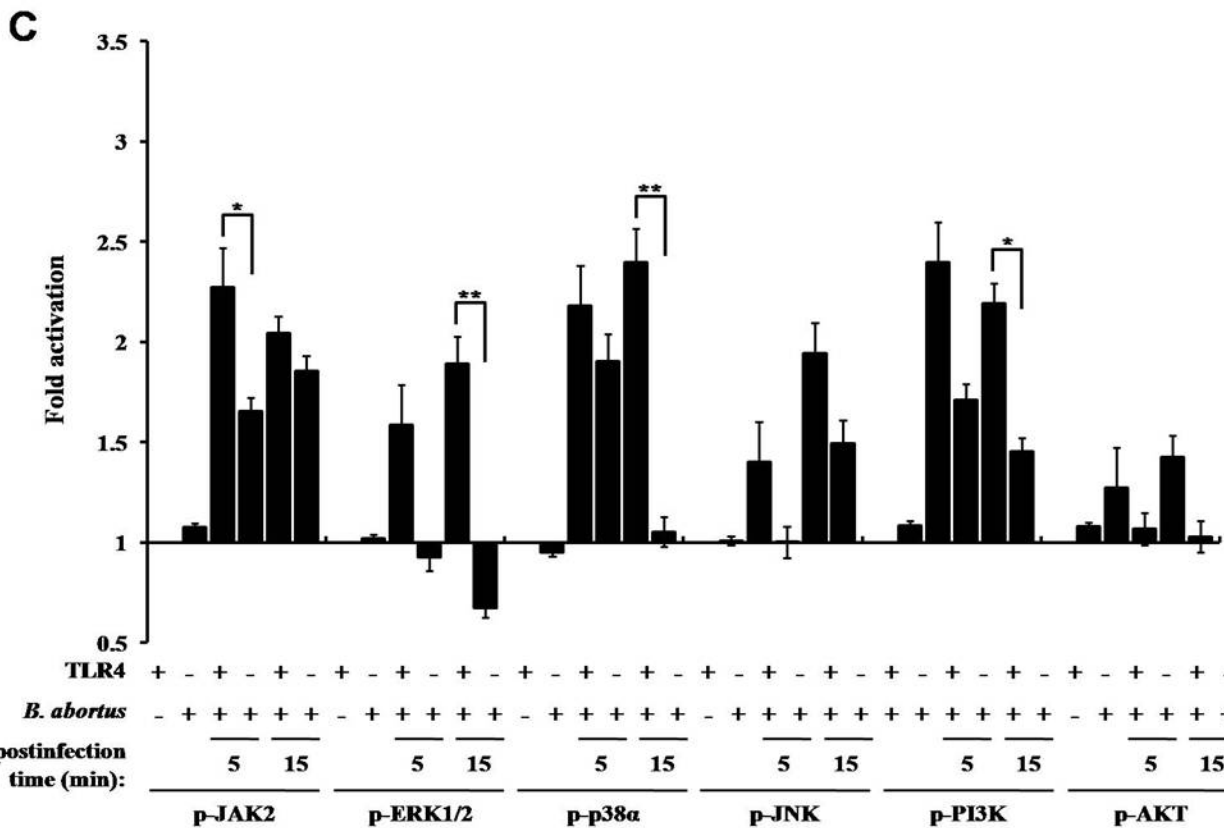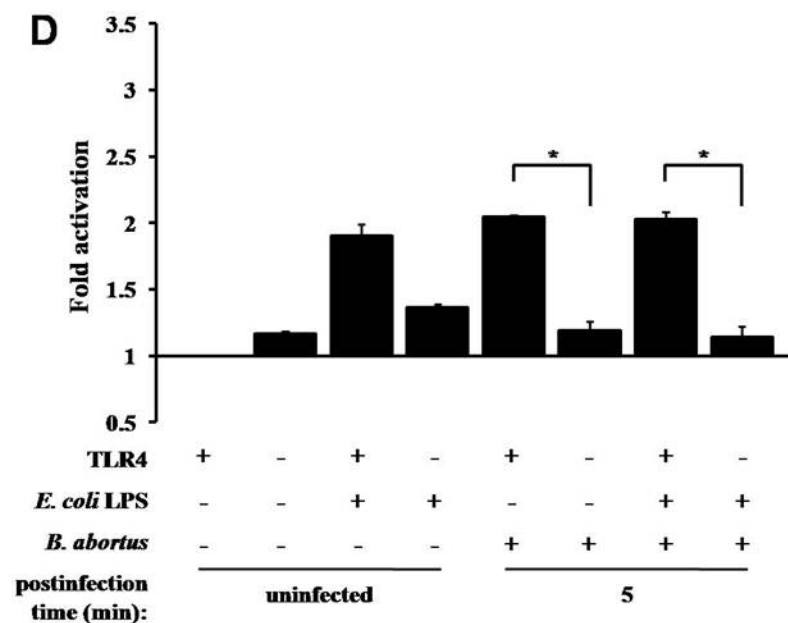

Supplement: IAI.00403-13_zii999090199so3.pdf [file IAI.00403-13_zii999090199so3.pdf]
